# Supplementary material
Source: publisher figshare collection journal article supplement (https://frontiersin.figshare.com/ndownloader/files/28240245)
Supplement: Supplementary file [file 28240245]

## *Supplementary Material*

### **A component-resolved therapeutic vaccine for cockroach allergy made of Per a 9 and transforming growth factor- $\beta$ homologue, an immunosuppressive protein of *Brugia malayi***

**Pannathee Prangtaworn<sup>1,2</sup>, Kodchakorn Mahasongkram<sup>2</sup>, Atiporn Saeung<sup>3</sup>, Urai Chaisri<sup>4</sup>, Watee Seesui<sup>2</sup>, Onrapak Reamtong<sup>5</sup>, Anchalee Tungtrongchitr<sup>2</sup>, Wanpen Chaicumpa<sup>2</sup>, Nitat Sookrung<sup>2,6,\*</sup>**

<sup>1</sup> Graduate Program in Immunology, Department of Immunology, Faculty of Medicine Siriraj Hospital, Mahidol University, Bangkok 10700, Thailand

<sup>2</sup> Center of Research Excellence on Therapeutic Proteins and Antibody Engineering, Department of Parasitology, Faculty of Medicine Siriraj Hospital, Mahidol University, Bangkok 10700, Thailand

<sup>3</sup> Department of Parasitology, Faculty of Medicine, Chiang-Mai University, Chiang-Mai 50200, Thailand

<sup>4</sup> Department of Tropical Pathology, Faculty of Tropical Medicine, Mahidol University, Bangkok 10400, Thailand

<sup>5</sup> Department of Tropical Molecular Biology and Genetics, Faculty of Tropical Medicine, Mahidol University, Bangkok 10400, Thailand

<sup>6</sup> Biomedical Research Incubation Unit, Department of Research, Faculty of Medicine Siriraj Hospital, Mahidol University, Bangkok 10700, Thailand

**Supplementary Table 1.** Grades and histological features of mouse lung sections stained with hematoxylin and eosin (H&E), periodic acid–Schiff (PAS), and Masson’s trichrome (TRI) dyes.

| <b>Grade</b> | <b>Histological features revealed by H&amp;E staining</b>                                                                                                                         |
|--------------|-----------------------------------------------------------------------------------------------------------------------------------------------------------------------------------|
| 0            | Bronchiole with single layer of ciliated epithelial cells, negligible inflammatory cell infiltration into peribronchiolar tissue, submucosa containing normal smooth muscle cells |
| 1            | Thickened bronchiole with ciliated pseudo-stratified columnar epithelial cells, few inflammatory cells in the interstitial area, mild degeneration of smooth muscle cells         |
| 2            | Bronchiolar epithelial hyperplasia, 2–3 layers of inflammatory cells around the bronchiole, degeneration and detachment of smooth muscle in the submucosal area                   |
| 3            | Epithelial hyperplasia and sloughing, intense inflammatory cell infiltration, necrosis of smooth muscle cells and blockade of the airway                                          |
| <b>Grade</b> | <b>Histological features revealed by PAS staining</b>                                                                                                                             |
| 0            | No goblet cells                                                                                                                                                                   |
| 1            | 1–5 goblet cells                                                                                                                                                                  |
| 2            | 6–20 goblet cells                                                                                                                                                                 |
| 3            | More than 20 goblet cells                                                                                                                                                         |
| <b>Grade</b> | <b>Histological features revealed by TRI staining</b>                                                                                                                             |
| 0            | Normal collagen content of alveolar septa and thin-walled alveoli                                                                                                                 |
| 1            | Mild collagen deposition and thick fibrosis of the alveolar septa                                                                                                                 |
| 2            | Moderate collagen deposition and continuous fibrosis of the alveolar septa                                                                                                        |
| 3            | Excessive collagen deposition leading to thickened alveolar septa, compressed alveoli, confluent fibrotic mass, and fibroplasia                                                   |

**Supplementary Table 2.** Oligonucleotide primers used in qRT-PCR for monitoring cytokine gene expression.

| Gene                         | Primer sequence                                                          | Size of PCR product (bp) |
|------------------------------|--------------------------------------------------------------------------|--------------------------|
| <i>IL-4</i>                  | F: 5'-TCGGCATTTCGAAACGAGGTC-3'<br>R: 5'-GAAAAGCCCCGAAAGAGTCTC-3'         | 216                      |
| <i>IL-5</i>                  | F: 5'-ATGATCGTGCCTCTGTGCCTGGAGC-3'<br>R: 5'-CTGTTTTTCCTGGAGTAAACTGGGG-3' | 242                      |
| <i>IL-6</i>                  | F: 5'-TCCAGTTGCCTTCTTGGGAC-3'<br>R: 5'-GTACTCCAGAAGACCAGAGG-3'           | 331                      |
| <i>IL-13</i>                 | F: 5'-CGCTGGCGGGTTCTGTGTAG-3'<br>R: 5'-GAGGCTGGAGACCGTAGTGGG-3'          | 127                      |
| <i>TNF-α</i>                 | F: 5'-CATCTTCTCAAAATTCGAGTGACAA-3'<br>R: 5'-TGGGAGTAGACAAGGTACAACCC-3'   | 175                      |
| <i>IL-12a</i> (p35)          | F: 5'-CCACCCTTGCCCTCCTAAAC-3'<br>R: 5'-GTTTTTCTCTGGCCGTCTTCA-3'          | 132                      |
| <i>IL-12b</i> (p40)          | F: 5'-GGAAGCACGGCAGCAGAATA-3'<br>R: 5'-AACTTGAGGGAGAAGTAGGAATGG-3'       | 180                      |
| <i>IL-17A</i>                | F: 5'-CAGGGAGAGCTTCATCTGTGT-3'<br>R: 5'-GCTGAGCTTTGAGGGATGAT-3'          | 94                       |
| <i>IFN-γ</i>                 | F: 5'-AACGCTACACACTGCATCTTGG-3'<br>R: 5'-GACTTCAAAGAGTCTGAGG-3'          | 237                      |
| <i>IL-10</i>                 | F: 5'-CGGGAAGACAATAACTG-3'<br>R: 5'-CATTTCCGATAAGGCTTGG-3'               | 186                      |
| <i>TGF-β</i>                 | F: 5'-CAAGGGCTACCATGCCAACT-3'<br>R: 5'-AGGGCAAGGACCTTGCTG-3'             | 84                       |
| <i>IL-35</i> ( <i>ebi3</i> ) | F: 5'-CAATGCCATGCTTCTCGGTAT-3'<br>R: 5'-GGACGTGGATCTGGTGGAGTT-3'         | 84                       |
| <i>β-actin</i>               | F: 5'-GGCCAACCGTGAAAAGATGA-3'<br>R: 5'-CACGCTCGGTCAGGATCTTC-3'           | 251                      |

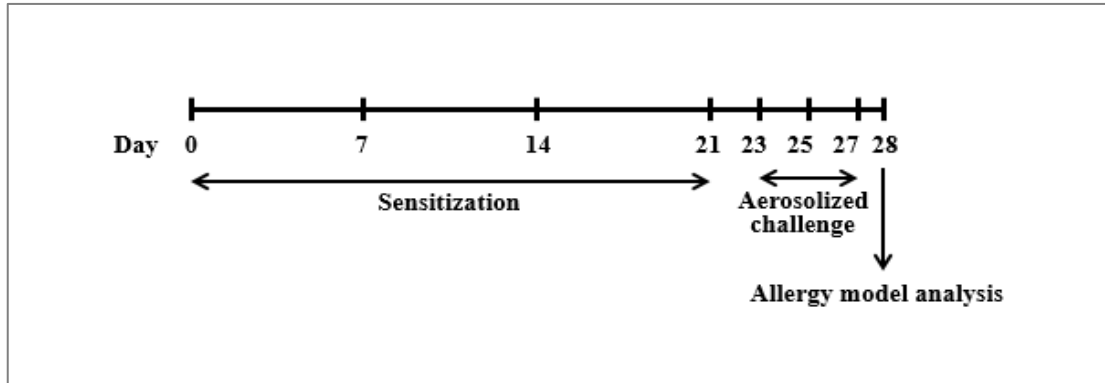

**Supplementary Figure 1.** Experimental timeline for preparation of allergenized and sham mice.

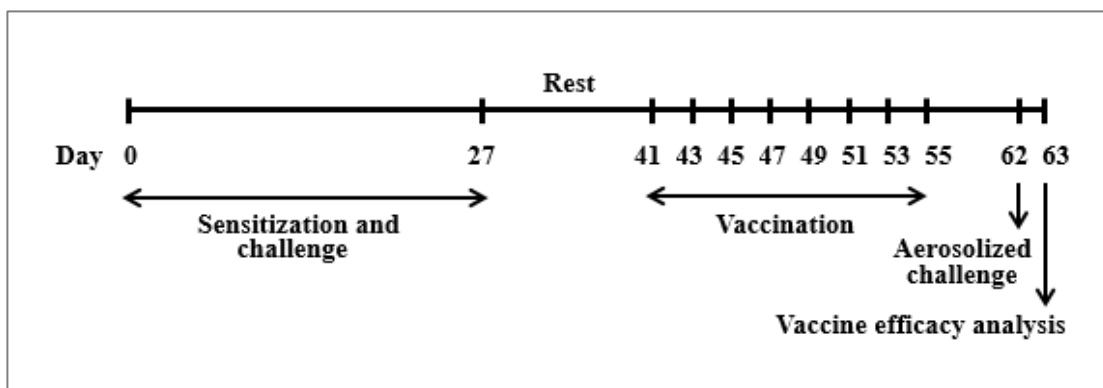

**Supplementary Figure 2.** Experimental timeline of vaccination (immunotherapy) of allergic mice, allergen provocation (aerosolized challenge) and vaccine efficacy analysis (determination of the therapeutic efficacies of vaccines after vaccination and CRE-provocation).

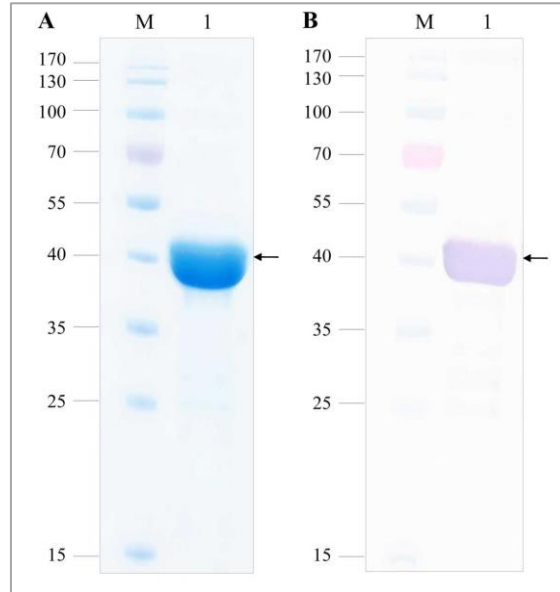

**Supplementary Figure 3.** Recombinant 6×-His tagged-Per a 9. (A) SDS-PAGE-separated purified recombinant 6×-His tagged Per a 9 (38-40 kDa). (B) Western blot pattern of the SDS-PAGE-separated purified recombinant 6×-His tagged-Per a 9 after probing with anti-6x-His antibody. Lanes M, Protein markers; lanes 1, purified recombinant 6×-His tagged Per a 9. Numbers at the left of (A) and (B) are protein masses in kDa.

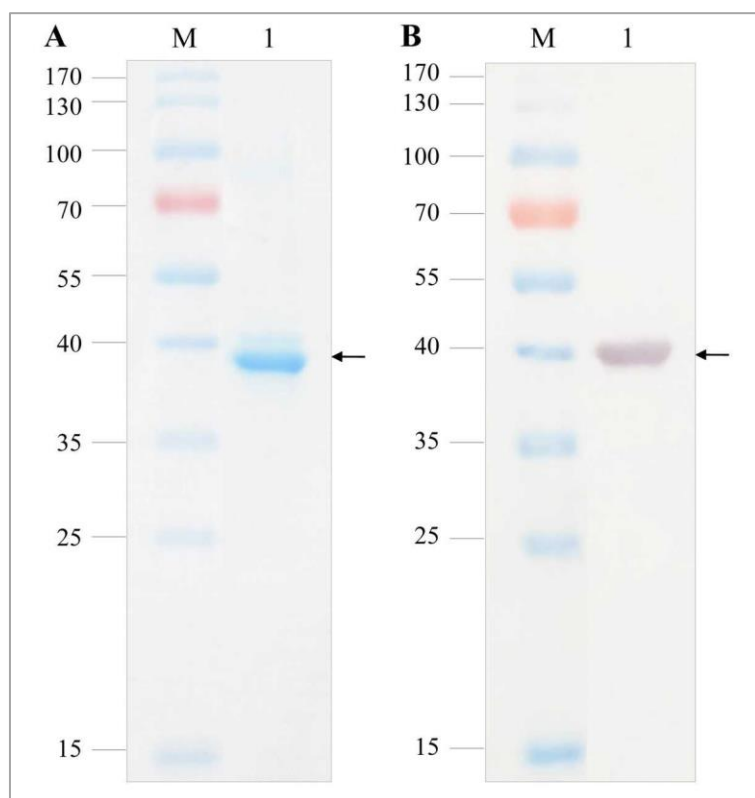

**Supplementary Figure 4.** Recombinant TGH. (A) SDS-PAGE-separated pattern of recombinant TGH (~38 kDa) after staining with CBB (lane 1); (B) Western blot pattern of SDS-PAGE-separated recombinant TGH probed with anti-6× His antibody (lane 1). Lanes M of (A) and (B), Protein markers. Numbers at the left of (A) and (B) are protein molecular masses in kDa.
